# Supplementary material for: Machine-Learning Screening of Early Cervical Lesions Using HPV Genotyping and Exploratory Fusion-Gene Analysis
Source: Research Square preprint supplement (doi:10.21203/rs.3.rs-7859112/v1), 2025-11-21
Supplement: Supplementary file 1 [file 4b12aa3f407b2a1f338053c0.xlsx]

## Sheet: Sheet1
Model	Group	ROC AUC	F1 Score	MCC	Accuracy	Sensitivity	Specificity	Precision	PR AUC	Best Threshold	Best Parameters
Logistic Regression	Tir1|RFF	0.916536	0.866811	0.741233	0.87015	0.845078	0.895223	0.889692	0.933336	0.419175	{'C': 10, 'penalty': 'l1', 'solver': 'liblinear'}
Decision Tree	Tir1|RFF	0.933089	0.882759	0.766732	0.883347	0.878332	0.888361	0.88723	0.933122	0.44186	{'max_depth': 20, 'min_samples_leaf': 4, 'min_samples_split': 10}
Extremely Randomized Trees	Tir1|RFF	0.948711	0.886391	0.776228	0.887965	0.874109	0.901821	0.899023	0.951838	0.524699	{'max_depth': 30, 'min_samples_leaf': 1, 'min_samples_split': 10, 'n_estimators': 50}
k-Nearest Neighbors	Tir1|RFF	0.920148	0.879459	0.760131	0.880048	0.875165	0.88493	0.883795	0.936238	0.443978	{'metric': 'euclidean', 'n_neighbors': 9, 'weights': 'distance'}
Gradient Boosting	Tir1|RFF	0.940135	0.877698	0.763391	0.881103	0.853259	0.908947	0.903577	0.944563	0.636136	{'learning_rate': 0.2, 'max_depth': 3, 'n_estimators': 200}
Random Forest	Tir1|RFF	0.949248	0.884179	0.774335	0.886778	0.864344	0.909211	0.904946	0.952473	0.563631	{'max_depth': 30, 'min_samples_leaf': 1, 'min_samples_split': 10, 'n_estimators': 200}
XGBoost	Tir1|RFF	0.900451	0.865795	0.726875	0.863157	0.882819	0.843494	0.849416	0.864839	0.582252	{'learning_rate': 0.01, 'max_depth': 3, 'n_estimators': 50, 'reg_alpha': 0, 'reg_lambda': 0}
LightGBM	Tir1|RFF	0.945171	0.88423	0.771393	0.88559	0.873845	0.897334	0.894865	0.945542	0.538202	{'learning_rate': 0.1, 'max_depth': 7, 'n_estimators': 200}
Support Vector Machine	Tir1|RFF	0.920315	0.872489	0.749074	0.874373	0.859594	0.889153	0.885776	0.935339	0.547084	{'C': 1, 'gamma': 'scale', 'kernel': 'rbf'}
CatBoost	Tir1|RFF	0.945453	0.881067	0.77422	0.885854	0.845606	0.926102	0.919633	0.948273	0.687899	{'depth': 7, 'iterations': 200, 'l2_leaf_reg': 5, 'learning_rate': 0.2}
AdaBoost	Tir1|RFF	0.904104	0.865353	0.722583	0.860253	0.898126	0.822381	0.834887	0.876543	0.530196	{'algorithm': 'SAMME', 'learning_rate': 1.0, 'n_estimators': 200}
Gaussian Process	Tir1|RFF	0.930676	0.870237	0.748502	0.873713	0.846925	0.900501	0.894869	0.937403	0.5	{'max_iter_predict': 10, 'n_restarts_optimizer': 0, 'warm_start': True}
Multilayer Perceptron	Tir1|RFF	0.927657	0.871007	0.74556	0.872658	0.859857	0.885458	0.882449	0.941563	0.489057	{'activation': 'relu', 'alpha': 0.01, 'batch_size': 128, 'hidden_layer_sizes': (100, 50), 'learning_rate_init': 0.01, 'max_iter': 200}
Logistic Regression	Tir2	0.914033	0.866658	0.737132	0.868435	0.855107	0.881763	0.878525	0.930775	0.300776	{'C': 10, 'penalty': 'l1', 'solver': 'liblinear'}
Decision Tree	Tir2	0.932196	0.881729	0.764616	0.882291	0.87754	0.887041	0.885958	0.93204	0.44186	{'max_depth': 20, 'min_samples_leaf': 4, 'min_samples_split': 10}
Extremely Randomized Trees	Tir2	0.9482	0.88496	0.773623	0.886646	0.871998	0.901293	0.898314	0.951203	0.519016	{'max_depth': 30, 'min_samples_leaf': 1, 'min_samples_split': 10, 'n_estimators': 200}
k-Nearest Neighbors	Tir2	0.918896	0.873653	0.743596	0.871602	0.887833	0.855371	0.859918	0.933669	0.444444	{'metric': 'euclidean', 'n_neighbors': 9, 'weights': 'uniform'}
Gradient Boosting	Tir2	0.939253	0.881561	0.768335	0.883874	0.864344	0.903405	0.899478	0.935533	0.581094	{'learning_rate': 0.2, 'max_depth': 5, 'n_estimators': 100}
Random Forest	Tir2	0.948365	0.884476	0.773184	0.886382	0.869887	0.902877	0.899563	0.951542	0.543754	{'max_depth': 30, 'min_samples_leaf': 1, 'min_samples_split': 10, 'n_estimators': 200}
XGBoost	Tir2	0.900101	0.865541	0.72554	0.862365	0.885986	0.838744	0.846018	0.864498	0.582036	{'learning_rate': 0.01, 'max_depth': 3, 'n_estimators': 50, 'reg_alpha': 0, 'reg_lambda': 0}
LightGBM	Tir2	0.944582	0.884211	0.770795	0.885326	0.875693	0.894959	0.892896	0.944608	0.521151	{'learning_rate': 0.2, 'max_depth': 7, 'n_estimators': 100}
Support Vector Machine	Tir2	0.918878	0.870198	0.746501	0.872922	0.85194	0.893903	0.889256	0.933988	0.609069	{'C': 1, 'gamma': 'auto', 'kernel': 'rbf'}
CatBoost	Tir2	0.944573	0.885349	0.779265	0.888889	0.85801	0.919768	0.914487	0.946774	0.649252	{'depth': 7, 'iterations': 200, 'l2_leaf_reg': 3, 'learning_rate': 0.2}
AdaBoost	Tir2	0.903323	0.865353	0.722583	0.860253	0.898126	0.822381	0.834887	0.873675	0.532371	{'algorithm': 'SAMME', 'learning_rate': 1.0, 'n_estimators': 200}
Gaussian Process	Tir2	0.929036	0.868528	0.745034	0.871998	0.845606	0.89839	0.892728	0.935949	0.5	{'max_iter_predict': 10, 'n_restarts_optimizer': 0, 'warm_start': True}
Multilayer Perceptron	Tir2	0.927218	0.872346	0.746153	0.873054	0.867511	0.878596	0.877235	0.940915	0.476754	{'activation': 'relu', 'alpha': 0.01, 'batch_size': 128, 'hidden_layer_sizes': (100, 50), 'learning_rate_init': 0.01, 'max_iter': 200}
Logistic Regression	Spearman	0.901608	0.875731	0.741853	0.868171	0.929005	0.807337	0.828235	0.899574	0.171117	{'C': 100, 'penalty': 'l1', 'solver': 'liblinear'}
Decision Tree	Spearman	0.909267	0.8799	0.751246	0.873449	0.927158	0.819741	0.837226	0.903504	0.368421	{'max_depth': None, 'min_samples_leaf': 4, 'min_samples_split': 2}
Extremely Randomized Trees	Spearman	0.919033	0.8792	0.752655	0.875693	0.904724	0.846661	0.855076	0.92032	0.487242	{'max_depth': None, 'min_samples_leaf': 1, 'min_samples_split': 10, 'n_estimators': 200}
k-Nearest Neighbors	Spearman	0.905258	0.877051	0.746021	0.87147	0.916865	0.826075	0.840552	0.906929	0.111111	{'metric': 'euclidean', 'n_neighbors': 9, 'weights': 'distance'}
Gradient Boosting	Spearman	0.916617	0.879846	0.754151	0.876485	0.90446	0.848509	0.856536	0.91541	0.502324	{'learning_rate': 0.1, 'max_depth': 5, 'n_estimators': 200}
Random Forest	Spearman	0.919415	0.880439	0.75447	0.876353	0.91053	0.842175	0.852273	0.91953	0.480287	{'max_depth': 30, 'min_samples_leaf': 1, 'min_samples_split': 10, 'n_estimators': 200}
XGBoost	Spearman	0.887079	0.87656	0.743239	0.868171	0.936131	0.800211	0.824117	0.853573	0.536574	{'learning_rate': 0.01, 'max_depth': 3, 'n_estimators': 50, 'reg_alpha': 0, 'reg_lambda': 0}
LightGBM	Spearman	0.915257	0.88053	0.754553	0.876353	0.911322	0.841383	0.851751	0.912045	0.459052	{'learning_rate': 0.2, 'max_depth': 7, 'n_estimators': 200}
Support Vector Machine	Spearman	0.9083	0.879671	0.753853	0.876353	0.903932	0.848773	0.856678	0.903343	0.412242	{'C': 1, 'gamma': 'scale', 'kernel': 'rbf'}
CatBoost	Spearman	0.917904	0.880864	0.756431	0.877672	0.90446	0.850884	0.858467	0.917302	0.504956	{'depth': 7, 'iterations': 200, 'l2_leaf_reg': 7, 'learning_rate': 0.2}
AdaBoost	Spearman	0.900398	0.874814	0.739778	0.866983	0.929533	0.804434	0.826179	0.874509	0.54154	{'algorithm': 'SAMME', 'learning_rate': 1.0, 'n_estimators': 200}
Gaussian Process	Spearman	0.912375	0.877401	0.75404	0.877012	0.880179	0.873845	0.874639	0.904849	0.500007	{'max_iter_predict': 10, 'n_restarts_optimizer': 0, 'warm_start': True}
Multilayer Perceptron	Spearman	0.920408	0.879515	0.754293	0.876748	0.89971	0.853787	0.860207	0.923141	0.495321	{'activation': 'tanh', 'alpha': 0.001, 'batch_size': 32, 'hidden_layer_sizes': (100,), 'learning_rate_init': 0.001, 'max_iter': 200}
Logistic Regression	Tir3|Wilcoxon	0.890466	0.873546	0.737656	0.866587	0.921615	0.81156	0.830243	0.849227	0.387488	{'C': 0.01, 'penalty': 'l2', 'solver': 'saga'}
Decision Tree	Tir3|Wilcoxon	0.897736	0.874376	0.739271	0.867247	0.92399	0.810504	0.829817	0.878893	0.444444	{'max_depth': None, 'min_samples_leaf': 4, 'min_samples_split': 10}
Extremely Randomized Trees	Tir3|Wilcoxon	0.902191	0.873772	0.738893	0.867775	0.915281	0.820269	0.835864	0.885729	0.552323	{'max_depth': None, 'min_samples_leaf': 2, 'min_samples_split': 5, 'n_estimators': 200}
k-Nearest Neighbors	Tir3|Wilcoxon	0.884002	0.870781	0.732567	0.864608	0.912378	0.816838	0.832811	0.867875	0.111111	{'metric': 'euclidean', 'n_neighbors': 9, 'weights': 'distance'}
Gradient Boosting	Tir3|Wilcoxon	0.901025	0.877061	0.745025	0.87015	0.926366	0.813935	0.83274	0.883176	0.440084	{'learning_rate': 0.1, 'max_depth': 7, 'n_estimators': 50}
Random Forest	Tir3|Wilcoxon	0.901624	0.87606	0.742733	0.868831	0.927158	0.810504	0.8303	0.883273	0.509514	{'max_depth': 10, 'min_samples_leaf': 1, 'min_samples_split': 2, 'n_estimators': 200}
XGBoost	Tir3|Wilcoxon	0.887444	0.872608	0.736354	0.866456	0.914753	0.818158	0.834176	0.856966	0.570769	{'learning_rate': 0.01, 'max_depth': 3, 'n_estimators': 50, 'reg_alpha': 0, 'reg_lambda': 0}
LightGBM	Tir3|Wilcoxon	0.899988	0.872194	0.737315	0.867775	0.902349	0.833201	0.843989	0.876501	0.636432	{'learning_rate': 0.2, 'max_depth': 5, 'n_estimators': 200}
Support Vector Machine	Tir3|Wilcoxon	0.889383	0.874415	0.73845	0.8654	0.937187	0.793613	0.819525	0.867665	0.484085	{'C': 0.01, 'gamma': 'scale', 'kernel': 'rbf'}
CatBoost	Tir3|Wilcoxon	0.901066	0.876374	0.743521	0.869359	0.926102	0.812615	0.831714	0.881068	0.493699	{'depth': 5, 'iterations': 200, 'l2_leaf_reg': 5, 'learning_rate': 0.1}
AdaBoost	Tir3|Wilcoxon	0.895556	0.873489	0.737221	0.86606	0.924782	0.807337	0.827586	0.871953	0.536441	{'algorithm': 'SAMME', 'learning_rate': 1.0, 'n_estimators': 200}
Gaussian Process	Tir3|Wilcoxon	0.897585	0.87574	0.742964	0.869755	0.91792	0.821589	0.837265	0.878596	0.500005	{'max_iter_predict': 10, 'n_restarts_optimizer': 0, 'warm_start': True}
Multilayer Perceptron	Tir3|Wilcoxon	0.900145	0.875281	0.741262	0.868303	0.924254	0.812352	0.831237	0.879756	0.469388	{'activation': 'relu', 'alpha': 0.001, 'batch_size': 32, 'hidden_layer_sizes': (100, 50), 'learning_rate_init': 0.001, 'max_iter': 200}
Logistic Regression	Tir4|Boruta	0.889705	0.874415	0.73845	0.8654	0.937187	0.793613	0.819525	0.852943	0.389382	{'C': 0.1, 'penalty': 'l2', 'solver': 'saga'}
Decision Tree	Tir4|Boruta	0.895588	0.874661	0.739066	0.865928	0.935603	0.796252	0.821172	0.875175	0.375	{'max_depth': None, 'min_samples_leaf': 4, 'min_samples_split': 10}
Extremely Randomized Trees	Tir4|Boruta	0.898439	0.87463	0.739011	0.865928	0.935339	0.796516	0.821321	0.878205	0.555152	{'max_depth': None, 'min_samples_leaf': 2, 'min_samples_split': 10, 'n_estimators': 100}
k-Nearest Neighbors	Tir4|Boruta	0.870527	0.855059	0.702375	0.850488	0.882027	0.81895	0.829692	0.86051	0.111111	{'metric': 'manhattan', 'n_neighbors': 9, 'weights': 'distance'}
Gradient Boosting	Tir4|Boruta	0.895947	0.874876	0.739642	0.866456	0.933756	0.799155	0.822982	0.874138	0.533592	{'learning_rate': 0.1, 'max_depth': 5, 'n_estimators': 100}
Random Forest	Tir4|Boruta	0.896261	0.874738	0.73925	0.86606	0.935339	0.79678	0.821511	0.876402	0.510003	{'max_depth': 10, 'min_samples_leaf': 2, 'min_samples_split': 5, 'n_estimators': 50}
XGBoost	Tir4|Boruta	0.886372	0.875077	0.739949	0.866324	0.936395	0.796252	0.821296	0.856396	0.566785	{'learning_rate': 0.01, 'max_depth': 3, 'n_estimators': 50, 'reg_alpha': 0, 'reg_lambda': 0}
LightGBM	Tir4|Boruta	0.89593	0.875278	0.740445	0.866719	0.935339	0.7981	0.822465	0.876903	0.468525	{'learning_rate': 0.1, 'max_depth': 7, 'n_estimators': 200}
Support Vector Machine	Tir4|Boruta	0.887529	0.874415	0.73845	0.8654	0.937187	0.793613	0.819525	0.850129	0.321532	{'C': 0.01, 'gamma': 'scale', 'kernel': 'sigmoid'}
CatBoost	Tir4|Boruta	0.896042	0.874783	0.739482	0.866456	0.932964	0.799947	0.823433	0.876044	0.578834	{'depth': 5, 'iterations': 200, 'l2_leaf_reg': 3, 'learning_rate': 0.1}
AdaBoost	Tir4|Boruta	0.892093	0.874353	0.738336	0.8654	0.936659	0.794141	0.81982	0.863474	0.624832	{'algorithm': 'SAMME', 'learning_rate': 0.1, 'n_estimators': 200}
Gaussian Process	Tir4|Boruta	0.89535	0.874103	0.73799	0.865664	0.9327	0.798628	0.822434	0.877299	0.519316	{'max_iter_predict': 10, 'n_restarts_optimizer': 0, 'warm_start': False}
Multilayer Perceptron	Tir4|Boruta	0.894458	0.875432	0.740721	0.866719	0.936659	0.79678	0.821718	0.87048	0.410767	{'activation': 'relu', 'alpha': 0.001, 'batch_size': 32, 'hidden_layer_sizes': (100,), 'learning_rate_init': 0.01, 'max_iter': 200}
Logistic Regression	RF-RFE	0.881585	0.871674	0.732799	0.863157	0.929533	0.79678	0.820596	0.840306	0.344427	{'C': 1, 'penalty': 'l1', 'solver': 'liblinear'}
Decision Tree	RF-RFE	0.914474	0.876458	0.744091	0.870018	0.922143	0.817894	0.835086	0.891205	0.4	{'max_depth': None, 'min_samples_leaf': 4, 'min_samples_split': 2}
Extremely Randomized Trees	RF-RFE	0.92256	0.879582	0.752358	0.875165	0.91185	0.83848	0.849521	0.90121	0.439074	{'max_depth': 20, 'min_samples_leaf': 1, 'min_samples_split': 5, 'n_estimators': 200}
k-Nearest Neighbors	RF-RFE	0.892575	0.873473	0.738192	0.867379	0.915545	0.819214	0.835099	0.882454	0.2	{'metric': 'euclidean', 'n_neighbors': 9, 'weights': 'distance'}
Gradient Boosting	RF-RFE	0.922412	0.880367	0.754109	0.876089	0.91185	0.840327	0.850985	0.900775	0.496461	{'learning_rate': 0.2, 'max_depth': 7, 'n_estimators': 50}
Random Forest	RF-RFE	0.922301	0.879654	0.752288	0.875033	0.913434	0.836632	0.848284	0.89903	0.56636	{'max_depth': 10, 'min_samples_leaf': 1, 'min_samples_split': 2, 'n_estimators': 200}
XGBoost	RF-RFE	0.896192	0.871801	0.73301	0.863157	0.930589	0.795724	0.82	0.853881	0.534375	{'learning_rate': 0.01, 'max_depth': 3, 'n_estimators': 50, 'reg_alpha': 0, 'reg_lambda': 0}
LightGBM	RF-RFE	0.921794	0.879563	0.752197	0.875033	0.912642	0.837424	0.848797	0.898246	0.461903	{'learning_rate': 0.2, 'max_depth': 7, 'n_estimators': 200}
Support Vector Machine	RF-RFE	0.874517	0.871833	0.734293	0.865136	0.917392	0.812879	0.830585	0.837741	0.672939	{'C': 1, 'gamma': 'scale', 'kernel': 'rbf'}
CatBoost	RF-RFE	0.921999	0.880438	0.754035	0.875957	0.913434	0.83848	0.849742	0.898393	0.485145	{'depth': 7, 'iterations': 200, 'l2_leaf_reg': 3, 'learning_rate': 0.2}
AdaBoost	RF-RFE	0.895852	0.871896	0.73317	0.863157	0.93138	0.794933	0.819554	0.854305	0.512831	{'algorithm': 'SAMME', 'learning_rate': 1.0, 'n_estimators': 200}
Gaussian Process	RF-RFE	0.900253	0.873236	0.736858	0.86606	0.922671	0.809448	0.828829	0.868077	0.519094	{'max_iter_predict': 10, 'n_restarts_optimizer': 0, 'warm_start': True}
Multilayer Perceptron	RF-RFE	0.899077	0.874344	0.739226	0.867247	0.923727	0.810768	0.829974	0.867232	0.512123	{'activation': 'relu', 'alpha': 0.0001, 'batch_size': 32, 'hidden_layer_sizes': (100, 50), 'learning_rate_init': 0.001, 'max_iter': 200}
Logistic Regression	Tir5	0.886965	0.874415	0.73845	0.8654	0.937187	0.793613	0.819525	0.848497	0.37888	{'C': 1, 'penalty': 'l2', 'solver': 'liblinear'}
Decision Tree	Tir5	0.889445	0.875447	0.740794	0.866851	0.935867	0.797836	0.822356	0.862487	0.5	{'max_depth': 10, 'min_samples_leaf': 1, 'min_samples_split': 5}
Extremely Randomized Trees	Tir5	0.889897	0.875262	0.740371	0.866587	0.936131	0.797044	0.821826	0.863177	0.4325	{'max_depth': None, 'min_samples_leaf': 1, 'min_samples_split': 10, 'n_estimators': 50}
k-Nearest Neighbors	Tir5	0.888458	0.874569	0.738813	0.865664	0.936659	0.794669	0.820199	0.860462	0.111111	{'metric': 'manhattan', 'n_neighbors': 9, 'weights': 'distance'}
Gradient Boosting	Tir5	0.888912	0.875123	0.740077	0.866456	0.935867	0.797044	0.821784	0.859514	0.549312	{'learning_rate': 0.1, 'max_depth': 5, 'n_estimators': 50}
Random Forest	Tir5	0.889637	0.875046	0.739894	0.866324	0.936131	0.796516	0.821445	0.862206	0.410258	{'max_depth': None, 'min_samples_leaf': 1, 'min_samples_split': 10, 'n_estimators': 100}
XGBoost	Tir5	0.884561	0.875077	0.739949	0.866324	0.936395	0.796252	0.821296	0.850101	0.566785	{'learning_rate': 0.01, 'max_depth': 3, 'n_estimators': 50, 'reg_alpha': 0, 'reg_lambda': 0}
LightGBM	Tir5	0.889156	0.874969	0.739711	0.866192	0.936395	0.795988	0.821106	0.861886	0.502892	{'learning_rate': 0.1, 'max_depth': 7, 'n_estimators': 100}
Support Vector Machine	Tir5	0.883415	0.864594	0.718942	0.857482	0.910003	0.804962	0.823501	0.847908	0.192783	{'C': 1, 'gamma': 'scale', 'kernel': 'linear'}
CatBoost	Tir5	0.889215	0.875664	0.741272	0.867115	0.935867	0.798364	0.822738	0.861514	0.505564	{'depth': 7, 'iterations': 200, 'l2_leaf_reg': 7, 'learning_rate': 0.2}
AdaBoost	Tir5	0.889063	0.874784	0.73929	0.865928	0.936659	0.795197	0.820578	0.85546	0.640944	{'algorithm': 'SAMME', 'learning_rate': 0.1, 'n_estimators': 200}
Gaussian Process	Tir5	0.888876	0.875201	0.740261	0.866587	0.935603	0.797572	0.822124	0.859471	0.534143	{'max_iter_predict': 10, 'n_restarts_optimizer': 0, 'warm_start': False}
Multilayer Perceptron	Tir5	0.890328	0.874784	0.73929	0.865928	0.936659	0.795197	0.820578	0.851835	0.525768	{'activation': 'relu', 'alpha': 0.001, 'batch_size': 32, 'hidden_layer_sizes': (100, 50), 'learning_rate_init': 0.01, 'max_iter': 200}
Logistic Regression	Tir6|LASSO	0.875054	0.874415	0.73845	0.8654	0.937187	0.793613	0.819525	0.832481	0.535823	{'C': 0.01, 'penalty': 'l1', 'solver': 'liblinear'}
Decision Tree	Tir6|LASSO	0.872379	0.874415	0.73845	0.8654	0.937187	0.793613	0.819525	0.834757	0.666667	{'max_depth': None, 'min_samples_leaf': 2, 'min_samples_split': 2}
Extremely Randomized Trees	Tir6|LASSO	0.872323	0.874415	0.73845	0.8654	0.937187	0.793613	0.819525	0.834221	0.58	{'max_depth': None, 'min_samples_leaf': 1, 'min_samples_split': 2, 'n_estimators': 50}
k-Nearest Neighbors	Tir6|LASSO	0.872761	0.874415	0.73845	0.8654	0.937187	0.793613	0.819525	0.835131	0.111111	{'metric': 'euclidean', 'n_neighbors': 9, 'weights': 'uniform'}
Gradient Boosting	Tir6|LASSO	0.872378	0.874415	0.73845	0.8654	0.937187	0.793613	0.819525	0.834381	0.565823	{'learning_rate': 0.01, 'max_depth': 7, 'n_estimators': 50}
Random Forest	Tir6|LASSO	0.872406	0.874415	0.73845	0.8654	0.937187	0.793613	0.819525	0.834605	0.668262	{'max_depth': None, 'min_samples_leaf': 2, 'min_samples_split': 2, 'n_estimators': 200}
XGBoost	Tir6|LASSO	0.871703	0.874415	0.73845	0.8654	0.937187	0.793613	0.819525	0.829432	0.613006	{'learning_rate': 0.01, 'max_depth': 3, 'n_estimators': 50, 'reg_alpha': 0, 'reg_lambda': 0}
LightGBM	Tir6|LASSO	0.872389	0.874415	0.73845	0.8654	0.937187	0.793613	0.819525	0.834767	0.744115	{'learning_rate': 0.01, 'max_depth': 7, 'n_estimators': 200}
Support Vector Machine	Tir6|LASSO	0.875054	0.874415	0.73845	0.8654	0.937187	0.793613	0.819525	0.832481	0.583	{'C': 0.01, 'gamma': 'scale', 'kernel': 'linear'}
CatBoost	Tir6|LASSO	0.872427	0.874415	0.73845	0.8654	0.937187	0.793613	0.819525	0.834881	0.670227	{'depth': 5, 'iterations': 200, 'l2_leaf_reg': 3, 'learning_rate': 0.1}
AdaBoost	Tir6|LASSO	0.874819	0.874415	0.73845	0.8654	0.937187	0.793613	0.819525	0.830342	0.738976	{'algorithm': 'SAMME', 'learning_rate': 0.1, 'n_estimators': 100}
Gaussian Process	Tir6|LASSO	0.872058	0.874523	0.738688	0.865532	0.937187	0.793877	0.819714	0.832741	0.755223	{'max_iter_predict': 10, 'n_restarts_optimizer': 0, 'warm_start': True}
Multilayer Perceptron	Tir6|LASSO	0.874979	0.874415	0.73845	0.8654	0.937187	0.793613	0.819525	0.83331	0.761386	{'activation': 'relu', 'alpha': 0.0001, 'batch_size': 32, 'hidden_layer_sizes': (50,), 'learning_rate_init': 0.01, 'max_iter': 200}
