# Supplementary material for: Machine-Learning Screening of Early Cervical Lesions Using HPV Genotyping and Exploratory Fusion-Gene Analysis
Source: Research Square preprint supplement (doi:10.21203/rs.3.rs-7859112/v1), 2025-11-21
Supplement: Supplementary file 2 [file fe98076a463ba3f5d029c815.docx]

**Table S1. Primers Targeting HPV16 Fusion Gene Loci**

| **Oligo name** | **Base Sequence (5'--3')** |
| --- | --- |
| primerF HPV16--(1-6 ) | AGTACAGACCTACGTGACCATATAGAC |
| primerF HPV16--(7-12,28) | GCTCACACAAAGGACGGATTAAC |
| primerF HPV16--(13-18,29-32) | GGAATTGTGTGCCCCATCTGT |
| primerF HPV16--(19-21) | GCGGGTATGGCAATACTGAAGT |
| primerF HPV16--(22-27 ) | CACAGAGCTGCAAACAACTATACAT |
| primerR HPV16--(1,7,13) | CTGAGAAGCCCTGCCCTTC |
| primerR HPV16--(2,8,14) | AAATACGGCTGCACCGAGT |
| primerR HPV16--(3,9,15) | GGTGATCCAGACTCTGACCTTTTG |
| primerR HPV16--(4,10,16) | ATCATGATGGCTGTATGTGCCA |
| primerR HPV16--(5,11,17) | CATGGTTCCACCAGCGTTATT |
| primerR HPV16--(6,12,18) | TCTTTGCTCGCAGCTCGT |
| primerR HPV16--(19,22,29) | GTTTTCGTCAAATGGAAACTCATTAGGA |
| primerR HPV16--(20,23,30) | TGACACACATTTAAACGTTGGCAAAG |
| primerR HPV16--(21,24,31) | AAGGCGACGGCTTTGGTAT |
| primerR HPV16--(25) | TGTCCAGATGTCTTTGCTTTTCTTCA |
| primerR HPV16--(26) | TCAGTTGTCTCTGGTTGCAAATCT |
| primerR HPV16--(27) | CCATTAACAGGTCTTCCAAAGTACGA |
| primerR HPV16--(28,32) | ATCCGTGCTTACAACCTTAGATACTG |

**Table S2. Primers Targeting HPV52 Fusion Gene Loci**

| **Oligo name** | **Base Sequence (5'--3')** |
| --- | --- |
| primerF HPV52--(1-6 ) | GCTGATAGTAATGACCTAAACGCACAAA |
| primerF HPV52--(7-12,28,29) | TCACTGCAACTGAGTGCACAA |
| primerF HPV52--(13-18,30-34) | GCTGTTGGGCACATTACAAGTT |
| primerF HPV52--(19-21) | CAAACCATGTCACGTAGAAGACAG |
| primerF HPV52--(22-27 ) | AGAATCGGTGCATGAAATAAGGCT |
| primerR HPV52--(1,7,13) | CTGAGAAGCCCTGCCCTTC |
| primerR HPV52--(2,8,14) | AAATACGGCTGCACCGAGT |
| primerR HPV52--(3,9,15) | GGTGATCCAGACTCTGACCTTTTG |
| primerR HPV52--(4,10,16) | ATCATGATGGCTGTATGTGCCA |
| primerR HPV52--(5,11,17) | CATGGTTCCACCAGCGTTATT |
| primerR HPV52--(6,12,18) | TCTTTGCTCGCAGCTCGT |
| primerR HPV52--(19,22,30) | GGGTTTTTGAAATGAAACACAACCAATC |
| primerR HPV52--(20,23,31) | CGGTATCGACTCCATCGTTTTCC |
| primerR HPV52--(21,24,32) | GCGGAGGTCTTGGAGGTTT |
| primerR HPV52--(25) | CGCTTGTTTGCATTAACATGTCTTTCT |
| primerR HPV52--(26) | TCAGTTGTTTCAGGTTGCAGATCTAATA |
| primerR HPV52--(27) | GCATTTGCTGTAGAGTACGAAGGT |

**Table S3. Baseline characteristics of the training and validation sets**

| **Feature** | **Total Set**  **(n = 5452)** | **Training Set**  **(n = 4361)** | **Validation Set**  **(n = 1091)** | **P value** |
| --- | --- | --- | --- | --- |
| Lesions | 719 (13.2%) | 572 (13.1%) | 147 (13.5%) | 0.755 |
| Age | 34 (28–44) | 35 (28–44) | 34 (28–43) | 0.348 |
| High Risk count | 0 (0–0) | 0 (0–0) | 0 (0–0) | 0.856 |
| Medium Risk count | 0 (0–0) | 0 (0–0) | 0 (0–0) | 0.899 |
| Low Risk count | 0 (0–0) | 0 (0–0) | 0 (0–0) | 0.220 |
| HPV count | 0 (0–1) | 0 (0–1) | 0 (0–1) | 0.742 |
| HPV-16 | 136 (2.5%) | 115 (2.6%) | 21 (1.9%) | 0.177 |
| HPV-18 | 61 (1.1%) | 51 (1.2%) | 10 (0.9%) | 0.478 |
| HPV-31 | 45 (0.8%) | 34 (0.8%) | 11 (1.0%) | 0.576 |
| HPV-33 | 31 (0.6%) | 22 (0.5%) | 9 (0.8%) | 0.301 |
| HPV-35 | 23 (0.4%) | 16 (0.4%) | 7 (0.6%) | 0.199 |
| HPV-39 | 158 (2.9%) | 124 (2.8%) | 34 (3.1%) | 0.631 |
| HPV-45 | 21 (0.4%) | 16 (0.4%) | 5 (0.5%) | 0.592 |
| HPV-51 | 152 (2.8%) | 125 (2.9%) | 27 (2.5%) | 0.482 |
| HPV-52 | 334 (6.1%) | 268 (6.1%) | 66 (6.0%) | 0.906 |
| HPV-56 | 92 (1.7%) | 63 (1.4%) | 29 (2.7%) | 0.005 |
| HPV-58 | 159 (2.9%) | 131 (3.0%) | 28 (2.6%) | 0.442 |
| HPV-59 | 61 (1.1%) | 52 (1.2%) | 9 (0.8%) | 0.302 |
| HPV-66 | 64 (1.2%) | 50 (1.1%) | 14 (1.3%) | 0.708 |
| HPV-68 | 96 (1.8%) | 76 (1.7%) | 20 (1.8%) | 0.839 |
| HPV-26 | 3 (0.1%) | 1 (0.0%) | 2 (0.2%) | 0.104 |
| HPV-53 | 119 (2.2%) | 97 (2.2%) | 22 (2.0%) | 0.674 |
| HPV-73 | 14 (0.3%) | 10 (0.2%) | 4 (0.4%) | 0.499 |
| HPV-82 | 23 (0.4%) | 17 (0.4%) | 6 (0.5%) | 0.438 |
| HPV-6 | 58 (1.1%) | 39 (0.9%) | 19 (1.7%) | 0.015 |
| HPV-11 | 23 (0.4%) | 19 (0.4%) | 4 (0.4%) | 1.000 |
| HPV-34 | 25 (0.5%) | 22 (0.5%) | 3 (0.3%) | 0.451 |
| HPV-40 | 54 (1.0%) | 40 (0.9%) | 14 (1.3%) | 0.275 |
| HPV-42 | 137 (2.5%) | 110 (2.5%) | 27 (2.5%) | 0.928 |
| HPV-43 | 80 (1.5%) | 65 (1.5%) | 15 (1.4%) | 0.776 |
| HPV-44 | 70 (1.3%) | 48 (1.1%) | 22 (2.0%) | 0.016 |
| HPV-54 | 133 (2.4%) | 102 (2.3%) | 31 (2.8%) | 0.336 |
| HPV-55 | 57 (1.0%) | 45 (1.0%) | 12 (1.1%) | 0.843 |
| HPV-57 | 0 (0.0%) | 0 (0.0%) | 0 (0.0%) | 1.000 |
| HPV-61 | 153 (2.8%) | 126 (2.9%) | 27 (2.5%) | 0.458 |
| HPV-67 | 44 (0.8%) | 35 (0.8%) | 9 (0.8%) | 1.000 |
| HPV-69 | 7 (0.1%) | 6 (0.1%) | 1 (0.1%) | 1.000 |
| HPV-70 | 58 (1.1%) | 46 (1.1%) | 12 (1.1%) | 0.897 |
| HPV-71 | 35 (0.6%) | 28 (0.6%) | 7 (0.6%) | 1.000 |
| HPV-72 | 7 (0.1%) | 5 (0.1%) | 2 (0.2%) | 0.633 |
| HPV-81 | 130 (2.4%) | 106 (2.4%) | 24 (2.2%) | 0.655 |
| HPV-83 | 5 (0.1%) | 4 (0.1%) | 1 (0.1%) | 1.000 |
| HPV-84 | 82 (1.5%) | 67 (1.5%) | 15 (1.4%) | 0.695 |

**Note:** Continuous variables are expressed as mean ± SD or median (IQR); group differences were evaluated using the independent-samples t-test, Welch t-test, or Mann–Whitney U test as appropriate. Categorical variables are shown as n (%) and compared using the chi-square test with Yates’ correction or Fisher’s exact test.
